# Supplementary material
Source: Springer Nature journal article supplement (https://www.springermedizin.de/resource/supplementary/12943_2014_1496_MOESM9_ESM.pdf/9553028)
Supplement: MOESM9 [file 9553028]

| <b>GIST groups</b>     | <b>Type of chromosome aberration</b> | <b>Average nb of losses/tumor [min-max]</b> | <b>% of GIST</b> | <b>Average nb of gains/tumor [min-max]</b> | <b>% of GIST</b> | <b>Average nb of cnLOH/tumor [min-max]</b> | <b>% of GIST</b> |
|------------------------|--------------------------------------|---------------------------------------------|------------------|--------------------------------------------|------------------|--------------------------------------------|------------------|
| <b>PolyGIST (n=9)</b>  | <b>Whole chr.</b>                    | 0.44 [0-3]                                  | 22%              | 23 [9-43]                                  | 100%             | 3.67 [0-12]                                | 55%              |
|                        | <b>Chr. Arm</b>                      | 0 [0]                                       | 0%               | 3.11 [1-5]                                 | 100%             | 1.11 [0-3]                                 | 55%              |
|                        | <b>Segmental</b>                     | 1.33 [0-10]                                 | 22%              | 10 [0-35]                                  | 100%             | 2.67 [0-7]                                 | 44%              |
| <b>BiGIST (n=13)</b>   | <b>Whole chr.</b>                    | 2.23 [0-6]                                  | 92%              | 0.07 [0-1]                                 | 8%               | 0.38 [0-1]                                 | 38%              |
|                        | <b>Chr. Arm</b>                      | 1.46 [0-5]                                  | 77%              | 0.85 [0-4]                                 | 54%              | 0.39 [0-2]                                 | 23%              |
|                        | <b>Segmental</b>                     | 3.23 [0-9]                                  | 69%              | 0.77 [0-4]                                 | 38%              | 0.85 [0-4]                                 | 31%              |
| <b>All GIST (n=22)</b> | <b>Whole chr.</b>                    | 1.5 [0-6]                                   | 64%              | 9.45 [0-43]                                | 45%              | 1.72 [0-12]                                | 45%              |
|                        | <b>Chr. Arm</b>                      | 0.86 [0-5]                                  | 45%              | 1.78 [0-5]                                 | 73%              | 0.86 [0-3]                                 | 36%              |
|                        | <b>Segmental</b>                     | 2.45 [0-10]                                 | 50%              | 4.54 [0-35]                                | 64%              | 1.59 [0-7]                                 | 36%              |
